# Supplementary material
Source: Research Square preprint supplement (doi:10.21203/rs.3.rs-9671473/v1)
Supplement: Supplementary file 1 [file 248d4c0f5f5e1d7568a2af1f.docx]

**Supplement Figure 1:** Comparative docking and interaction analyses of Lawsone and *H2O2* molecules within the LPO enzyme active site.


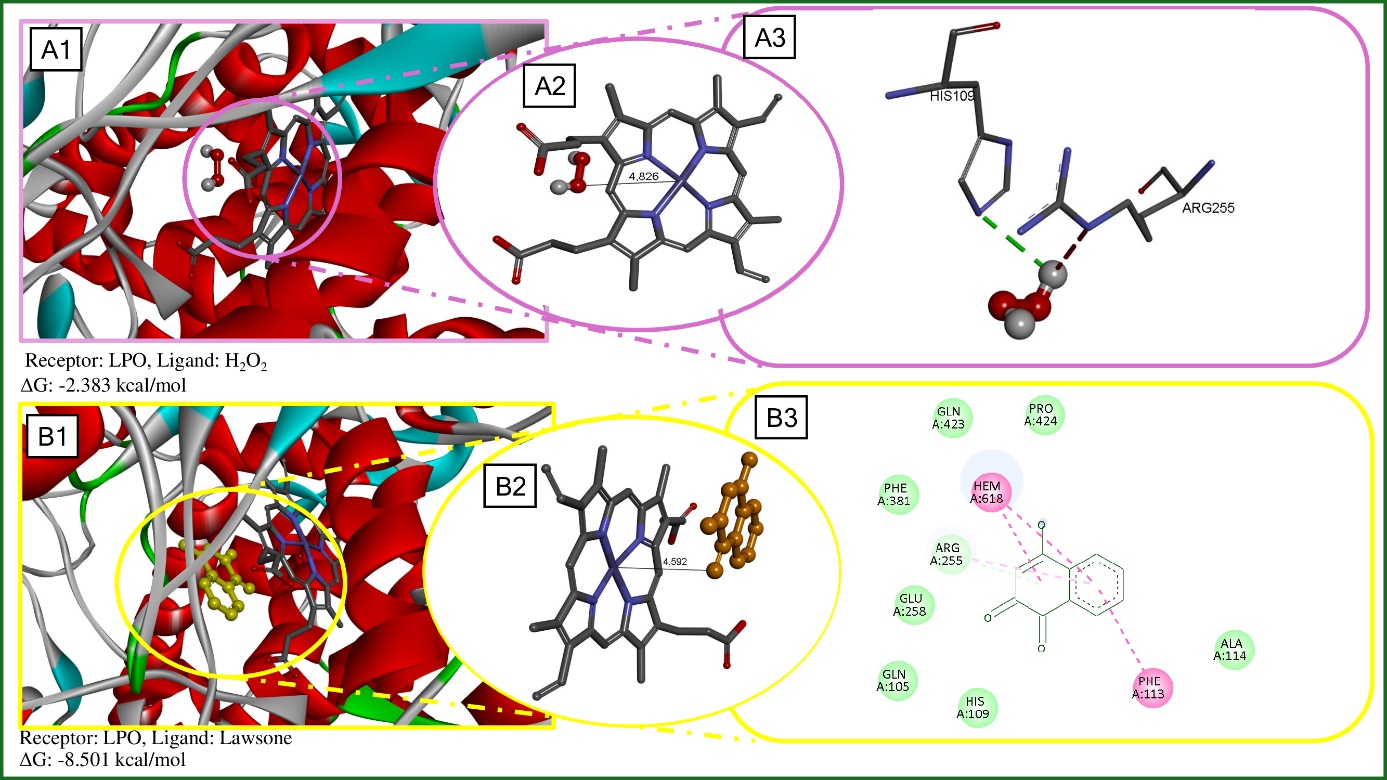


**Note:(A1)** 3D binding orientation of the *H2O2* molecule;**(A2)** Interatomic distance between *H2O2* and the heme center;**(A3)** Details showing the positional stability of *H2O2* in the active center and its interactions with HIS A:109 and ARG A:255;**(B1)** 3D binding orientation of Lawsone within the LPO active site;**(B2)** Interatomic distance between Lawsone and the heme center;**(B3)** 2D interaction map illustrating the interactions established by Lawsone with the heme cofactor and surrounding residues.
