# Supplementary material
Source: Research Square preprint supplement (doi:10.21203/rs.3.rs-9671473/v1)
Supplement: Supplementary file 2 [file 657397b50c4e8dbb9b69a9ee.docx]

**Supplement Table 1.** Detailed Information and Database Accession Numbers for Target Proteins and Ligands.

| **Biological Entity** | **Source Database** | **Accession ID / PDB Code** |
| --- | --- | --- |
| NOX | PDB | 7D3E |
| MPO | PDB | 6WY0 |
| LPO | PDB | 2R5L |
| G6PD | PDB | 7SNI |
| GRT | PDB | 3GRT |
| Catalase | PDB | 1DGF |
| TPO | AlphaFold DB | P07202 |
| GSSG | PubChem | CID 65359 |
| Lawson | PubChem | CID6755 |
| H2O2 | PubChem | CID784 |
