# Supplementary material
Source: Research Square preprint supplement (doi:10.21203/rs.3.rs-9671473/v1)
Supplement: Supplementary file 3 [file cc1ec84ee9308a28ba3063e2.docx]

**Supplement Figure 3:** Comparative docking and interaction analyses of Lawsone and NADPH molecules within the Catalase (CAT) enzyme active site.


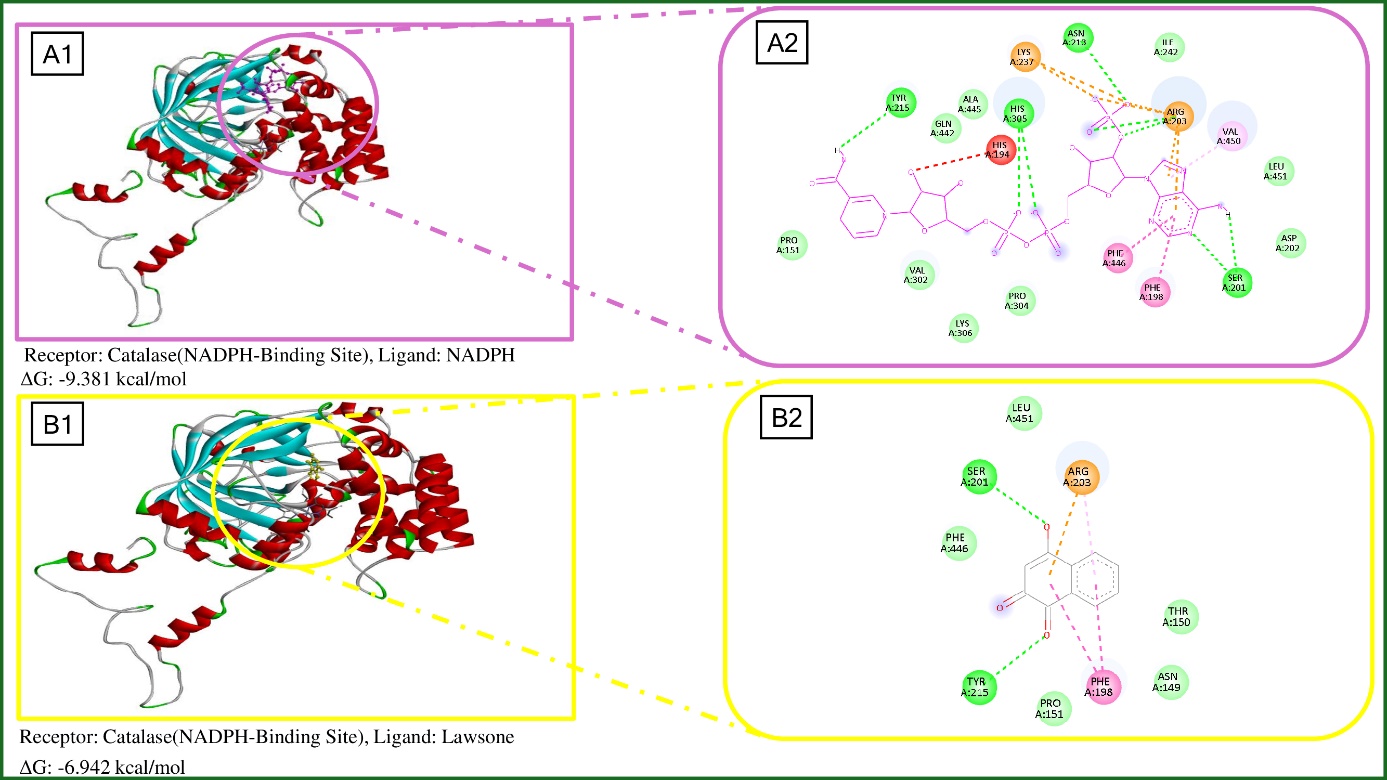


**Note: (A1)** 3D binding orientation of NADPH; **(A2)** 2D interaction map of NADPH illustrating the interaction network with surrounding residues; **(B1)** 3D binding orientation of Lawsone within the Catalase NADPH pocket; **(B2)** 2D interaction map of Lawsone illustrating interactions with surrounding residues and the cofactor site.
