# Supplementary material
Source: Research Square preprint supplement (doi:10.21203/rs.3.rs-9671473/v1)
Supplement: Supplementary file 4 [file df20987277d7c1d161220c54.docx]

**Supplement Figure 2:** Comparative docking and interaction analyses of Lawsone and GSSG molecules within the GPx enzyme active site.


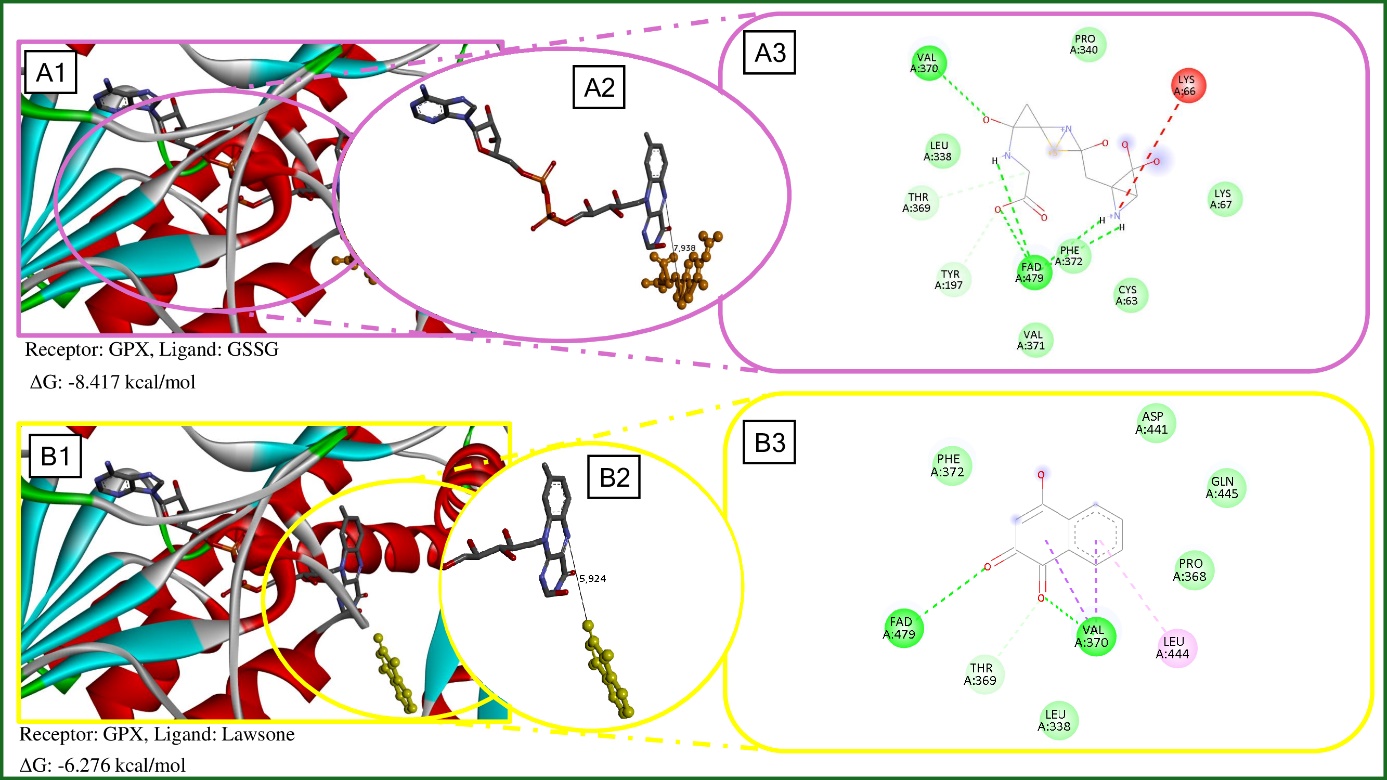


**Note:(A1)** 3D binding orientation of GSSG; **(A2)** Interatomic distance between GSSG and the catalytic center; **(A3)** 2D interaction map of GSSG illustrating the interaction network with surrounding residues; **(B1)** 3D binding orientation of Lawsone within the GPx pocket; **(B2)** Interatomic distance between Lawsone and the catalytic center; **(B3)** 2D interaction map of Lawsone illustrating interactions with surrounding residues and the cofactor.
