# Supplementary material
Source: Research Square preprint supplement (doi:10.21203/rs.3.rs-9671473/v1)
Supplement: Supplementary file 5 [file df91680805999af989bc0423.docx]

**Supplement Tablo 2.** Comparative Molecular Docking Analysis: Binding Affinities and Spatial Proximity of Lawsone and Native Substrates/Cofactors within the Catalytic Centers of Targeted Redox and Peroxidase Enzymes.

| **Target Receptor** | **Competing Ligands & Substrates** | **Grid Center Coordinates (X, Y, Z)** | **Grid Box Dimensions (Å³)** |
| --- | --- | --- | --- |
| G6PD | Lawson/NADP | 34.77;89.322;46.05 | 25x25x25 |
| NOX | Lawson/NADP | 114.7;83.779;127.78 | 25x25x25 |
| GPX | Lawson/GSSG | 67.42;49.94;17.59 | 25X25X25 |
| CATALASE (NADP CEBİ) | Lawson/NADP | 27.61;75.69;70.13 | 20x20x20 |
| CATALASE (HEME CEBİ) | Lawson/H2O2 | 25.04; 59.332; 55.18 | 20x20x20 |
| MPO | Lawson/H2O2 | 133.0;17.501;20.201 | 20x20x20 |
| LPO | Lawson/H2O2 | 10.009;2.191;26.615 | 20x20x20 |
| TPO | Lawson/H2O2 | -5.34;17.147;-0.807 | 15X15X15 |

**Note:** To ensure high-resolution sampling of the conformational space, the exhaustiveness parameter was set to 32 for all docking runs.
